# Supplementary material
Source: Springer Nature journal article supplement (https://www.springermedizin.de/resource/supplementary/12974_2011_457_MOESM1_ESM.pdf/9601354)

**A** Total cell density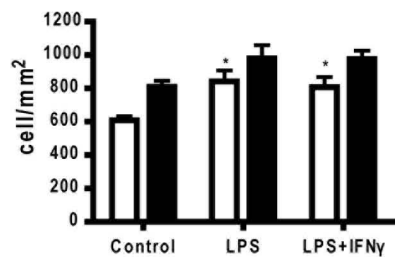**B** Microglia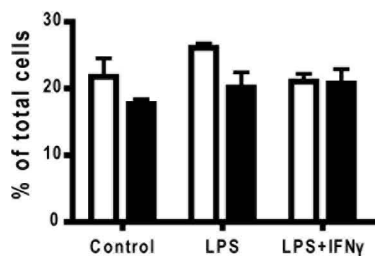**C**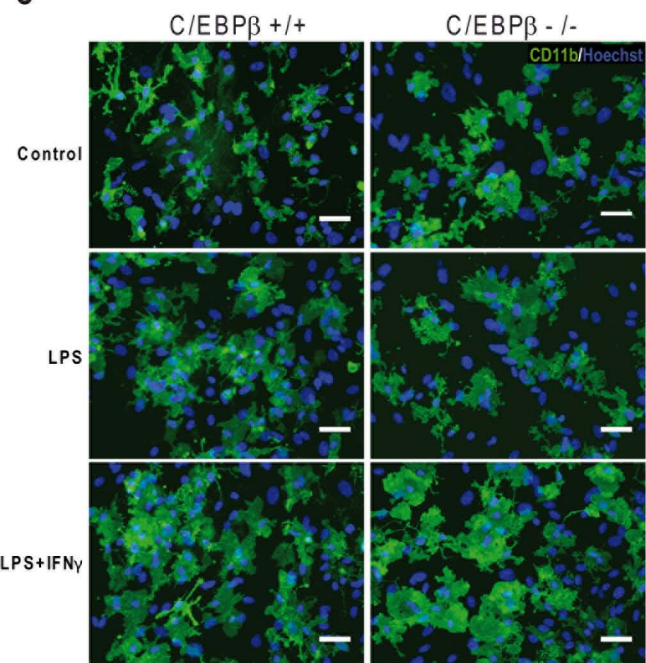**D** Astrocytes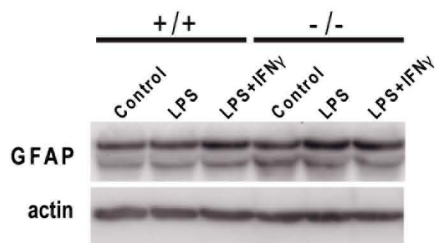**E**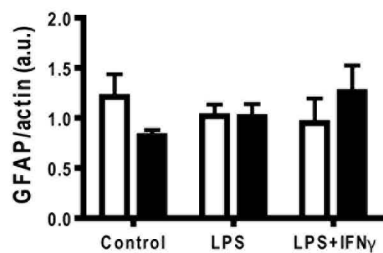**F**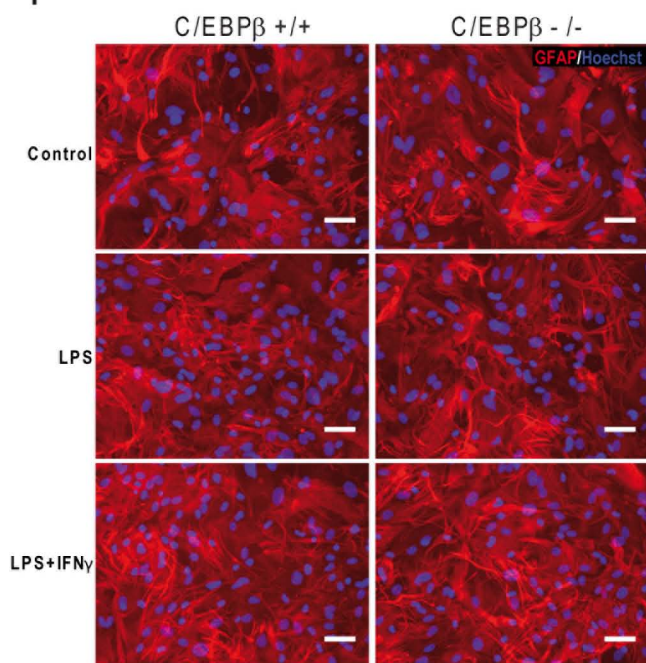

Supplement: MOESM1 [file 9601354]
